# Supplementary material
Source: PubMed Central journal article supplement (PMC7787270)
Supplement: NIHMS1655449-supplement-Table_S1-S3.pdf [file NIHMS1655449-supplement-Table_S1-S3.pdf]

| <b>Marker</b> | <b>Unit</b> | <b>Baseline (n=29)</b>   | <b>Post Treatment (n=21)</b> |
|---------------|-------------|--------------------------|------------------------------|
| IL-6          | pg/ml       | 4.26 (1.24 - 83.65)      | 9.04 (0.66 - 38.48)          |
| SDF1          | ng/ml       | 1.48 (0.44 - 3.44)       | 1.6 (0.36 - 4.78)            |
| VEGF-R1       | pg/ml       | 144.73 (37.1 - 2350)     | 135.92 (41.11 - 2669)        |
| VEGF-R2       | ng/ml       | 4.29 (0.35 - 10.32)      | 3.21 (1.05 - 6.18)           |
| Ang-2         | pg/ml       | 591.8 (319.9 - 1443.3)   | 663.9 (222.2 - 1975.1)       |
| PIGF          | pg/ml       | 15 (3.89 - 30.51)        | 18.94 (1.11 - 93.54)         |
| HGF           | pg/ml       | 379.3 (77.05 - 2988)     | 259.5 (98.42 - 1095.3)       |
| VEGF-A        | pg/ml       | 40.16 (3.37 - 402.3)     | 76.17 (9.83 - 443.3)         |
| VEGF-D        | ng/ml       | 1.37 (0.72 - 2.97)       | 1.31 (0.89 - 2.49)           |
| PDGF-BB       | pg/ml       | 480.27 (46.24 - 24652.5) | 486.7 (24.14 - 15397.5)      |
| TSP-2         | ng/ml       | 453.48 (173.6 - 1217)    | 426.25 (149.55 - 995.5)      |
| VEGF-R3       | ng/ml       | 255.55 (97.6 - 406.15)   | 190.05 (98.2 - 337.93)       |
| ICAM-1        | ng/ml       | 804.55 (398.25 - 2295)   | 751.2 (395.35 - 1839)        |
| TIMP-1        | ng/ml       | 203 (49.58 - 380.3)      | 201 (47.91 - 514.5)          |
| VCAM-1        | µg/ml       | 3.34 (1.46 - 7.03)       | 3.79 (2.01 - 10.77)          |
| GP130         | ng/ml       | 389.85 (274.15 - 658.2)  | 369.95 (232.85 - 662.9)      |
| IL-6R         | ng/ml       | 39.65 (19.42 - 73.81)    | 42.17 (22.95 - 70.31)        |
| OPN           | ng/ml       | 247.18 (96.66 - 1128.92) | 346.62 (72.72 - 1128.92)     |
| PDGF-AA       | pg/ml       | 100.89 (15.51 - 2409.75) | 162.95 (7.03 - 1478.38)      |
| TGFβ1         | ng/ml       | 23.86 (8.45 - 311.5)     | 23.02 (8.87 - 157.56)        |
| TGFβ2         | pg/ml       | 85.01 (51.87 - 202.6)    | 76.93 (47.95 - 170.27)       |
| BMP-9         | pg/ml       | 72.57 (30.85 - 156.6)    | 56.55 (14.36 - 121.12)       |
| TGFβ-R3       | ng/ml       | 119.98 (48.04 - 216.25)  | 114.83 (36.9 - 223.72)       |

Supplement table 1. Biomarker levels with the median level (range) shown for each marker.

| <b>Marker</b> | <b>HR</b> | <b>95% CI</b> | <b>P-value</b> | <b>Q-value</b> |
|---------------|-----------|---------------|----------------|----------------|
| VEGF-D        | 7.89      | 1.99- 31.34   | 0.0015         | 0.0344         |
| ICAM-1        | 4.82      | 1.46- 15.88   | 0.0083         | 0.0827         |
| VEGF-A        | 0.47      | 0.25- 0.89    | 0.0147         | 0.0827         |
| GP130         | 9.41      | 1.42- 62.56   | 0.0164         | 0.0827         |
| PDGF-AA       | 0.62      | 0.41- 0.95    | 0.0211         | 0.0827         |
| PDGF-BB       | 0.66      | 0.46- 0.96    | 0.0216         | 0.0827         |
| TGFβ1         | 0.38      | 0.16- 0.93    | 0.0293         | 0.0961         |
| IL-6          | 1.37      | 0.96- 1.96    | 0.0790         | 0.2051         |
| TIMP-1        | 1.91      | 0.90- 4.05    | 0.0839         | 0.2051         |
| VEGF-R1       | 1.29      | 0.95- 1.74    | 0.0906         | 0.2051         |
| TGFβ-R3       | 8.71      | 0.75- 100.62  | 0.0981         | 0.2051         |
| VCAM-1        | 2.17      | 0.80- 5.90    | 0.1292         | 0.2476         |
| HGF           | 1.37      | 0.86- 2.18    | 0.1862         | 0.3295         |
| PIGF          | 1.68      | 0.75- 3.76    | 0.2055         | 0.3376         |
| IL-6R         | 0.43      | 0.10- 1.80    | 0.2444         | 0.3748         |
| VEGF-R2       | 0.59      | 0.22- 1.58    | 0.2953         | 0.4245         |
| TSP-2         | 1.46      | 0.67- 3.16    | 0.3375         | 0.4566         |
| BMP-9         | 1.43      | 0.59- 3.44    | 0.4280         | 0.5469         |
| SDF1          | 1.36      | 0.60- 3.07    | 0.4653         | 0.5633         |
| VEGF-R3       | 1.33      | 0.29- 6.05    | 0.7100         | 0.8165         |
| OPN           | 0.93      | 0.53- 1.64    | 0.8041         | 0.8669         |
| TGFβ2         | 0.87      | 0.25- 3.08    | 0.8292         | 0.8669         |
| Ang-2         | 0.99      | 0.36- 2.72    | 0.9842         | 0.9842         |

Supplement table 2. Prognostic markers for PFS benefit. P-values and Q-values (corrected for multiple testing) for each marker are shown

| <b>Marker</b> | <b>HR</b> | <b>95% CI</b> | <b>P-value</b> | <b>Q-value</b> |
|---------------|-----------|---------------|----------------|----------------|
| IL-6          | 1.64      | 1.18- 2.27    | 0.0019         | 0.0287         |
| GP130         | 10.49     | 2.16- 50.87   | 0.0025         | 0.0287         |
| ICAM-1        | 4.41      | 1.47- 13.20   | 0.0068         | 0.0519         |
| VCAM-1        | 3.12      | 1.19- 8.12    | 0.0184         | 0.0930         |
| TIMP-1        | 2.28      | 1.11- 4.65    | 0.0202         | 0.0930         |
| TSP-2         | 2.35      | 1.08- 5.11    | 0.0278         | 0.1002         |
| PDGF-BB       | 0.73      | 0.54- 0.98    | 0.0305         | 0.1002         |
| VEGF-D        | 3.76      | 1.06- 13.38   | 0.0372         | 0.1045         |
| PDGF-AA       | 0.71      | 0.51- 0.99    | 0.0409         | 0.1045         |
| VEGF-R2       | 0.50      | 0.25- 1.04    | 0.0576         | 0.1325         |
| TGFβ1         | 0.56      | 0.28- 1.12    | 0.0961         | 0.2009         |
| TGFβ2         | 0.47      | 0.17- 1.31    | 0.1446         | 0.2537         |
| VEGF-R3       | 3.12      | 0.68- 14.37   | 0.1478         | 0.2537         |
| VEGF-A        | 0.77      | 0.53- 1.11    | 0.1544         | 0.2537         |
| Ang-2         | 1.59      | 0.74- 3.42    | 0.2308         | 0.3538         |
| OPN           | 0.73      | 0.43- 1.26    | 0.2578         | 0.3682         |
| VEGF-R1       | 1.15      | 0.90- 1.46    | 0.2722         | 0.3682         |
| SDF1          | 1.28      | 0.73- 2.23    | 0.3841         | 0.4909         |
| PIGF          | 1.28      | 0.62- 2.63    | 0.5051         | 0.6114         |
| BMP-9         | 0.78      | 0.33- 1.81    | 0.5578         | 0.6415         |
| HGF           | 1.12      | 0.74- 1.69    | 0.5921         | 0.6484         |
| IL-6R         | 1.16      | 0.36- 3.74    | 0.8030         | 0.8395         |
| TGFβ-R3       | 1.12      | 0.21- 5.95    | 0.8980         | 0.8980         |

Supplement table 3. Prognostic markers for OS benefit. P-values and Q-values (corrected for multiple testing) for each marker are shown
