# Supplementary material
Source: PubMed Central journal article supplement (PMC7787270)

# Supplement Figure 1

## Progression Free Survival

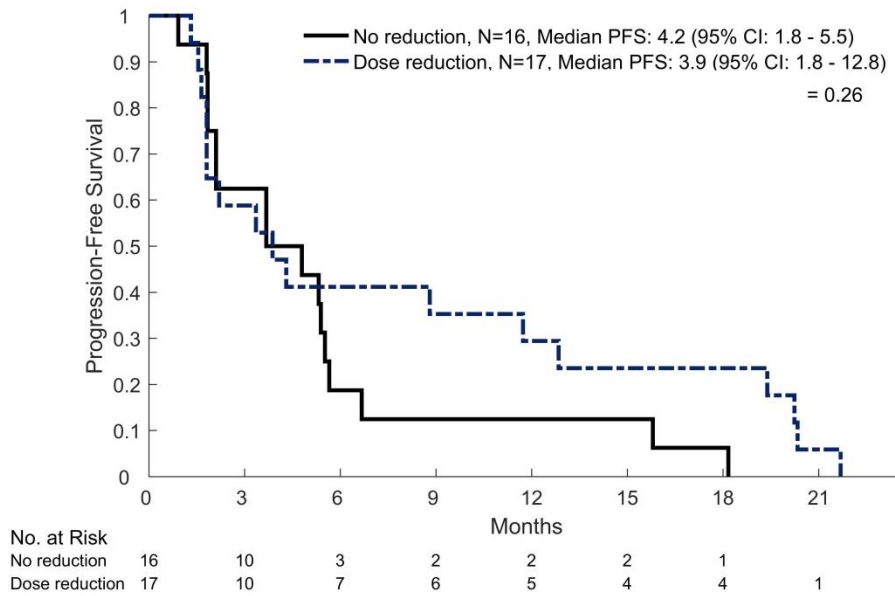

**HR: 0.65, 95% CI: 0.31-1.38**

## Overall Survival

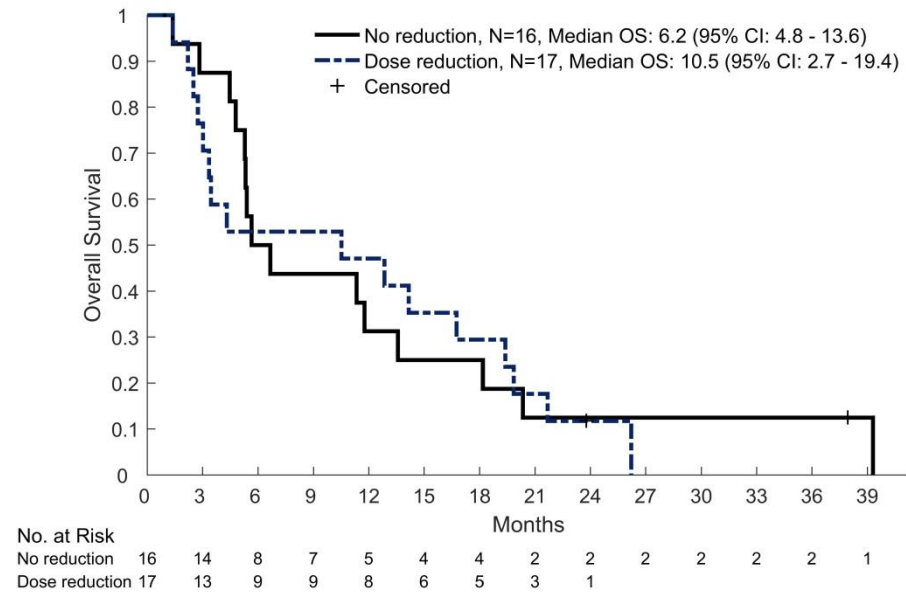

**HR: 1.11, 95% CI: 0.54-2.28**

Supplement: NIHMS1655449-supplement-Fig_S1.pdf [file NIHMS1655449-supplement-Fig_S1.pdf]

# Supplement Figure 2

## Progression Free Survival

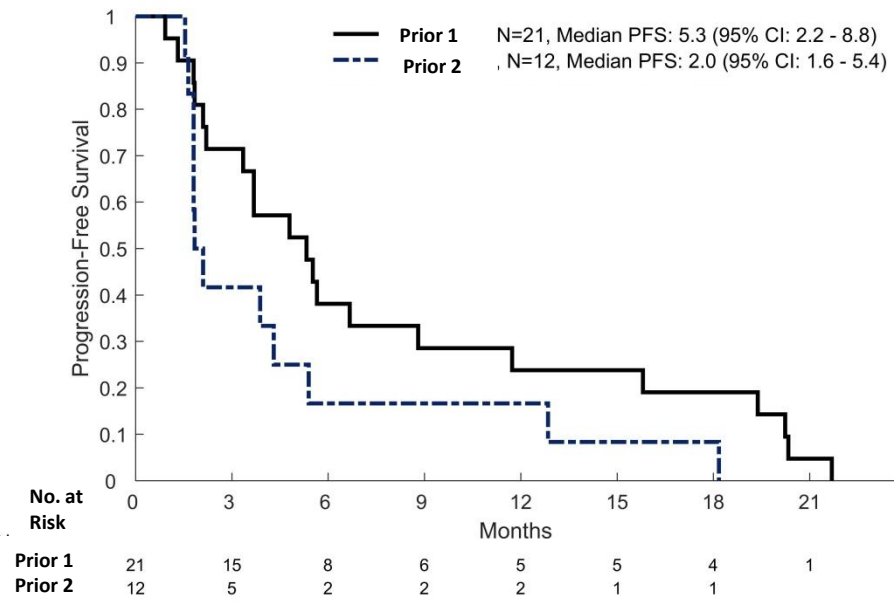

**HR: 0.51, 95% CI: 0.24-1.07**

## Overall Survival

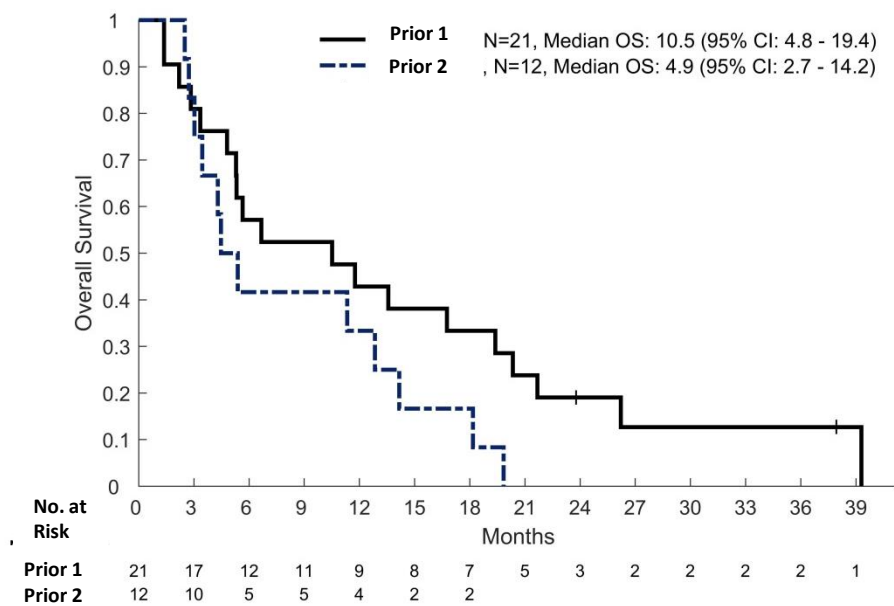

**HR: 0.53, 95% CI: 0.25-1.15**

Supplement: NIHMS1655449-supplement-Fig_S2.pdf [file NIHMS1655449-supplement-Fig_S2.pdf]
